# Supplementary material for: Assessing Water-Saving Technologies and the Impact of Giant Tortoise Herbivory on the Restoration of Opuntia megasperma var. orientalis on Española Island—Galapagos
Source: MDPI journal article supplement (doi:10.3390/w16030369), 2024-01-23
Supplement: s1 [file s1]

## Supplementary information

**Table S1.** Summary Statistics for plant height, age, and growth traits across different batches. Batch- averages, maximum values, minimum values, sample sizes (n), and standard errors (SE) are presented for the variables: Plant height (cm), Age (days), and growth (cm)

| Batch      | 1       | 2       | 3       | 4       | 5       | 6       |
|------------|---------|---------|---------|---------|---------|---------|
| avg_Height | 19.652  | 23.497  | 6.946   | 16.036  | 16.050  | 14.859  |
| max_Height | 53      | 58      | 49      | 26      | 24      | 33      |
| min_Height | 5       | 8       | 1       | 10      | 11      | 1       |
| n_Height   | 48      | 66      | 82      | 14      | 20      | 110     |
| SE_Height  | 1.320   | 1.080   | 0.913   | 1.103   | 0.709   | 0.494   |
| avg_Age    | 689.292 | 914.652 | 457.402 | 653.500 | 552.700 | 509.682 |
| max_Age    | 1608    | 1458    | 1095    | 1017    | 938     | 813     |
| min_Age    | 147     | 294     | 76      | 78      | 97      | 443     |
| n_Age      | 48      | 66      | 82      | 14      | 20      | 110     |
| SE_Age     | 83.353  | 46.975  | 34.572  | 72.467  | 61.466  | 13.253  |
| avg_Growth | 5.069   | 6.527   | 1.934   | 1.893   | 1.325   | 0.732   |
| max_Growth | 35      | 36.1    | 23      | 7.5     | 9       | 18.5    |
| min_Growth | 0       | 0       | 0       | 0       | 0       | 0       |
| n_Growth   | 48      | 66      | 82      | 14      | 20      | 110     |
| SE_Growth  | 1.236   | 0.955   | 0.385   | 0.506   | 0.465   | 0.271   |

**Table S2.** Analysis of the impact of treatment, planting date, and their interaction (treatment x planting date) on the studied traits. Significance is denoted by bold.

| Trait  |   | Treatment        | Planting date    | Treatment x Planting Date |
|--------|---|------------------|------------------|---------------------------|
| height | F | 21.502           | 9.685            | 0.371                     |
|        | p | <b>&lt;0.001</b> | <b>&lt;0.001</b> | 0.542                     |
| age    | F | 20.651           | 7.436            | 2.285                     |
|        | p | <b>&lt;0.001</b> | <b>0.006</b>     | 0.131                     |
| growth | F | 6.097            | 23.748           | 0.864                     |
|        | p | <b>0.003</b>     | <b>&lt;0.001</b> | 0.353                     |

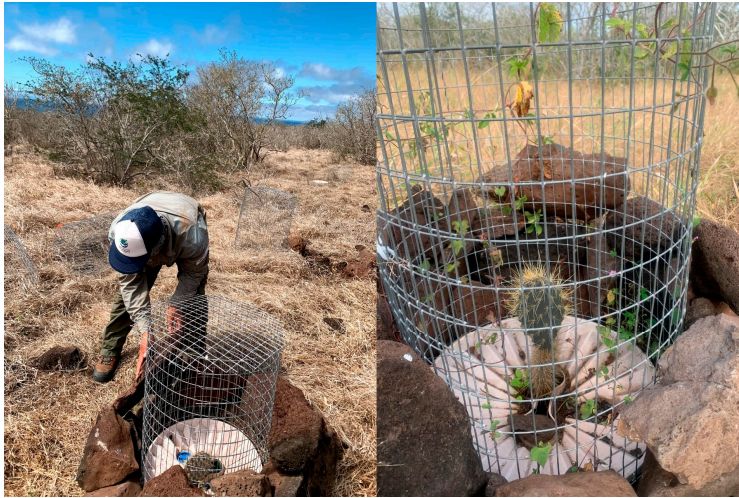

**Fig. S1.** Wire mesh fences placed around the Opuntias. Additional protection with rock was supplied to avoid fence damage by tortoises.

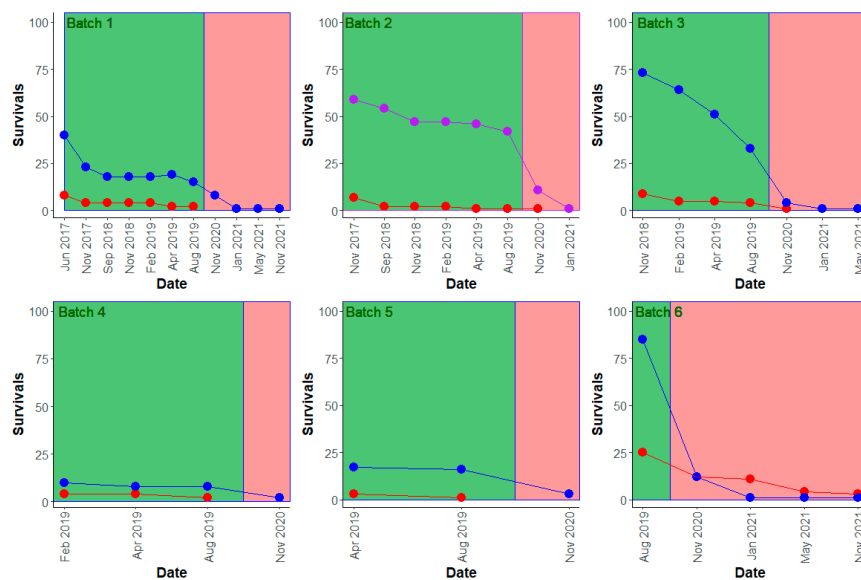

**Fig. S2.** Number of surviving plants based on batch and treatment. Red lines represent Control, blue is Waterboxx + hydrogel (W+H), and purple is Waterboxx only.

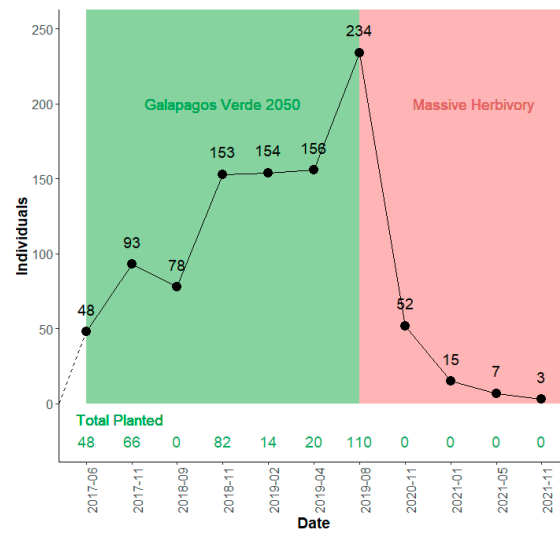

**Fig. S3.** Population balance between survivals and planted individuals on each monitoring date. The green background represents the time period when the plants were protected by the fences. And the red background the time when the fences were removed and no more plantings were conducted.
