# Supplementary material for: Assessing Water-Saving Technologies and the Impact of Giant Tortoise Herbivory on the Restoration of Opuntia megasperma var. orientalis on Española Island—Galapagos
Source: MDPI journal article supplement (doi:10.3390/w16030369), 2024-01-23
Supplement: s1 [file s1]

Archive with 1 entries (1 files):
- water-2759199-supplementary.pdf
